# Supplementary material for: Children’s and Families’ Determinants of Health-Related Behaviors in an Italian Primary School Sample: The “Seven Days for My Health” Project
Source: MDPI journal article supplement (doi:10.3390/ijerph19010460), 2022-01-01
Supplement: s1 [file s1]

**Table S1. Univariate analysis. Body Mass Index (BMI), International Obesity Task Force (IOTF), Physical Activity (PA).**

|                    | Characteristics                                     | N =<br>368 <sup>1</sup> | Child's<br>Kidmed<br>index; n ± SD | p-value | Child's<br>Screen Time;<br>minutes ± SD | p-value | Child's<br>Physical<br>Activity > 60<br>min/day; n<br>(%) | p-value |
|--------------------|-----------------------------------------------------|-------------------------|------------------------------------|---------|-----------------------------------------|---------|-----------------------------------------------------------|---------|
|                    |                                                     |                         |                                    |         |                                         |         |                                                           |         |
| Mother's variables | <b>BMI category</b>                                 |                         |                                    | 0.094   |                                         | 0.446   |                                                           | 0.764   |
|                    | Normalweight                                        | 280<br>(76%)            | 4.46±1.81                          |         | 84.48±65.41                             |         | 235 (84%)                                                 |         |
|                    | Overweight/Obese                                    | 88<br>(24%)             | 4.10±1.74                          |         | 95.68±83.68                             |         | 72 (82%)                                                  |         |
|                    | <b>Education</b>                                    |                         |                                    | 0.007   |                                         | 0.044   |                                                           | 0.225   |
|                    | ≤ Lower Secondary                                   | 73<br>(20%)             | 4.18±1.88                          |         | 104.13±93.09                            |         | 56 (77%)                                                  |         |
|                    | Higher secondary                                    | 185<br>(50%)            | 4.22±1.80                          |         | 89.18±68.70                             |         | 157 (85%)                                                 |         |
|                    | University Degree<br>or higher                      | 110<br>(30%)            | 4.76±1.69                          |         | 72.49±50.07                             |         | 94 (85%)                                                  |         |
|                    | <b>Employment<br/>Status</b>                        |                         |                                    | 0.768   |                                         | 0.863   |                                                           | 0.775   |
|                    | Employed                                            | 315<br>(86%)            | 4.38±1.80                          |         | 85.11±64.14                             |         | 264 (84%)                                                 |         |
|                    | Unemployed                                          | 53<br>(14%)             | 4.34±1.80                          |         | 99.30±99.07                             |         | 43 (81%)                                                  |         |
|                    | <b>More than 150<br/>minutes of PA per<br/>week</b> |                         |                                    | <0.001  |                                         | 0.581   |                                                           | 0.096   |
|                    | Yes                                                 | 108<br>(29%)            | 4.91±1.66                          |         | 79.91±54.49                             |         | 96 (89%)                                                  |         |
|                    | No                                                  | 260<br>(71%)            | 4.15±1.81                          |         | 90.17±75.73                             |         | 211 (81%)                                                 |         |
| Father's Variables | <b>BMI category</b>                                 |                         |                                    | 0.864   |                                         | 0.525   |                                                           | 0.181   |
|                    | Normalweight                                        | 152<br>(41%)            | 4.42±1.91                          |         | 89.16±71.24                             |         | 132 (87%)                                                 |         |
|                    | Overweight/Obese                                    | 216<br>(59%)            | 4.34±1.72                          |         | 85.75±69.67                             |         | 175 (81%)                                                 |         |
|                    | <b>Education</b>                                    |                         |                                    | 0.677   |                                         | 0.989   |                                                           | 0.829   |
|                    | ≤ Lower Secondary                                   | 105<br>(28%)            | 4.36±1.86                          |         | 89.51±78.36                             |         | 89 (85%)                                                  |         |
|                    | Higher secondary                                    | 192<br>(52%)            | 4.35±1.85                          |         | 87.87±71.62                             |         | 158 (82%)                                                 |         |
|                    | University Degree<br>or higher                      | 71<br>(20%)             | 4.44±1.59                          |         | 81.73±52.08                             |         | 60 (85%)                                                  |         |

| Child's Variables | Characteristics                                     | N =<br>368 <sup>1</sup> | Child's<br>Kidmed<br>index; n ± SD | p-value | Child's<br>Screen Time;<br>minutes ± SD | p-value | Child's<br>Physical<br>Activity > 60<br>min/day; n<br>(%) | p-value |
|-------------------|-----------------------------------------------------|-------------------------|------------------------------------|---------|-----------------------------------------|---------|-----------------------------------------------------------|---------|
|                   | <b>More than 150<br/>minutes of PA per<br/>week</b> |                         |                                    | 0.031   |                                         | 0.177   |                                                           | 0.024   |
|                   | Yes                                                 | 121<br>(33%)            | 4.67±1.91                          |         | 78.01±56.60                             |         | 109 (90%)                                                 |         |
|                   | No                                                  | 247<br>(67%)            | 4.23±1.73                          |         | 91.64±75.75                             |         | 198 (80%)                                                 |         |
|                   | <b>Sex</b>                                          |                         |                                    | 0.266   |                                         | 0.017   |                                                           | >0.999  |
|                   | Female                                              | 197<br>(54%)            | 4.44±1.70                          |         | 80.37±67.93                             |         | 164 (83%)                                                 |         |
|                   | Male                                                | 171<br>(46%)            | 4.30±1.91                          |         | 94.97±72.24                             |         | 143 (84%)                                                 |         |
|                   |                                                     |                         |                                    |         |                                         |         |                                                           |         |
|                   |                                                     |                         |                                    |         |                                         |         |                                                           |         |
|                   |                                                     |                         |                                    |         |                                         |         |                                                           |         |

**Table S2. Logistic regression model. Child's BMI predicted by parental BMI. Body Mass Index (BMI), confidence interval (CI).**

|              | Beta | 95% CI <sup>†</sup> | p-value |
|--------------|------|---------------------|---------|
| Mother's BMI | 1.06 | 1.02, 1.14          | 0.034   |
| Father's BMI | 1.12 | 1.03, 1.21          | 0.021   |
